# Supplementary material for: Genomic correlations for clinical outcomes in HER2-positive advanced gastric cancers treated using trastuzumab-based therapy
Source: Research Square preprint supplement (doi:10.21203/rs.3.rs-7267337/v1), 2025-08-08
Supplement: Supplementary file 1 [file 6fbaf38ef36140abf4c3cda1.docx]

**Supplementary materials**

**Genomic correlations for clinical outcomes in HER2-positive advanced gastric cancers treated using trastuzumab-based therapy**

Sun Young Lee1,*, Jaewon Hyung1,*, Hyung-Don Kim1, Hyungeun Lee1, Meesun Moon1, Young Soo Park2, Min-Hee Ryu1

1 Department of Oncology, Asan Medical Center, University of Ulsan College of Medicine, Seoul, Republic of Korea

2 Department of Pathology, Asan Medical Center, University of Ulsan College of Medicine, Seoul, Republic of Korea

* Equally contributed as co-first authors.

**Corresponding author**

**Min-Hee Ryu, M.D., Ph.D.**

Department of Oncology, Asan Medical Center, University of Ulsan College of Medicine, 88, Olympic-ro 43-gil, Songpa-gu, Seoul 05505, Republic of Korea

Tel.: +82-2-3010-5953

Email: [miniryu@amc.seoul.kr](mailto:miniryu@amc.seoul.kr)


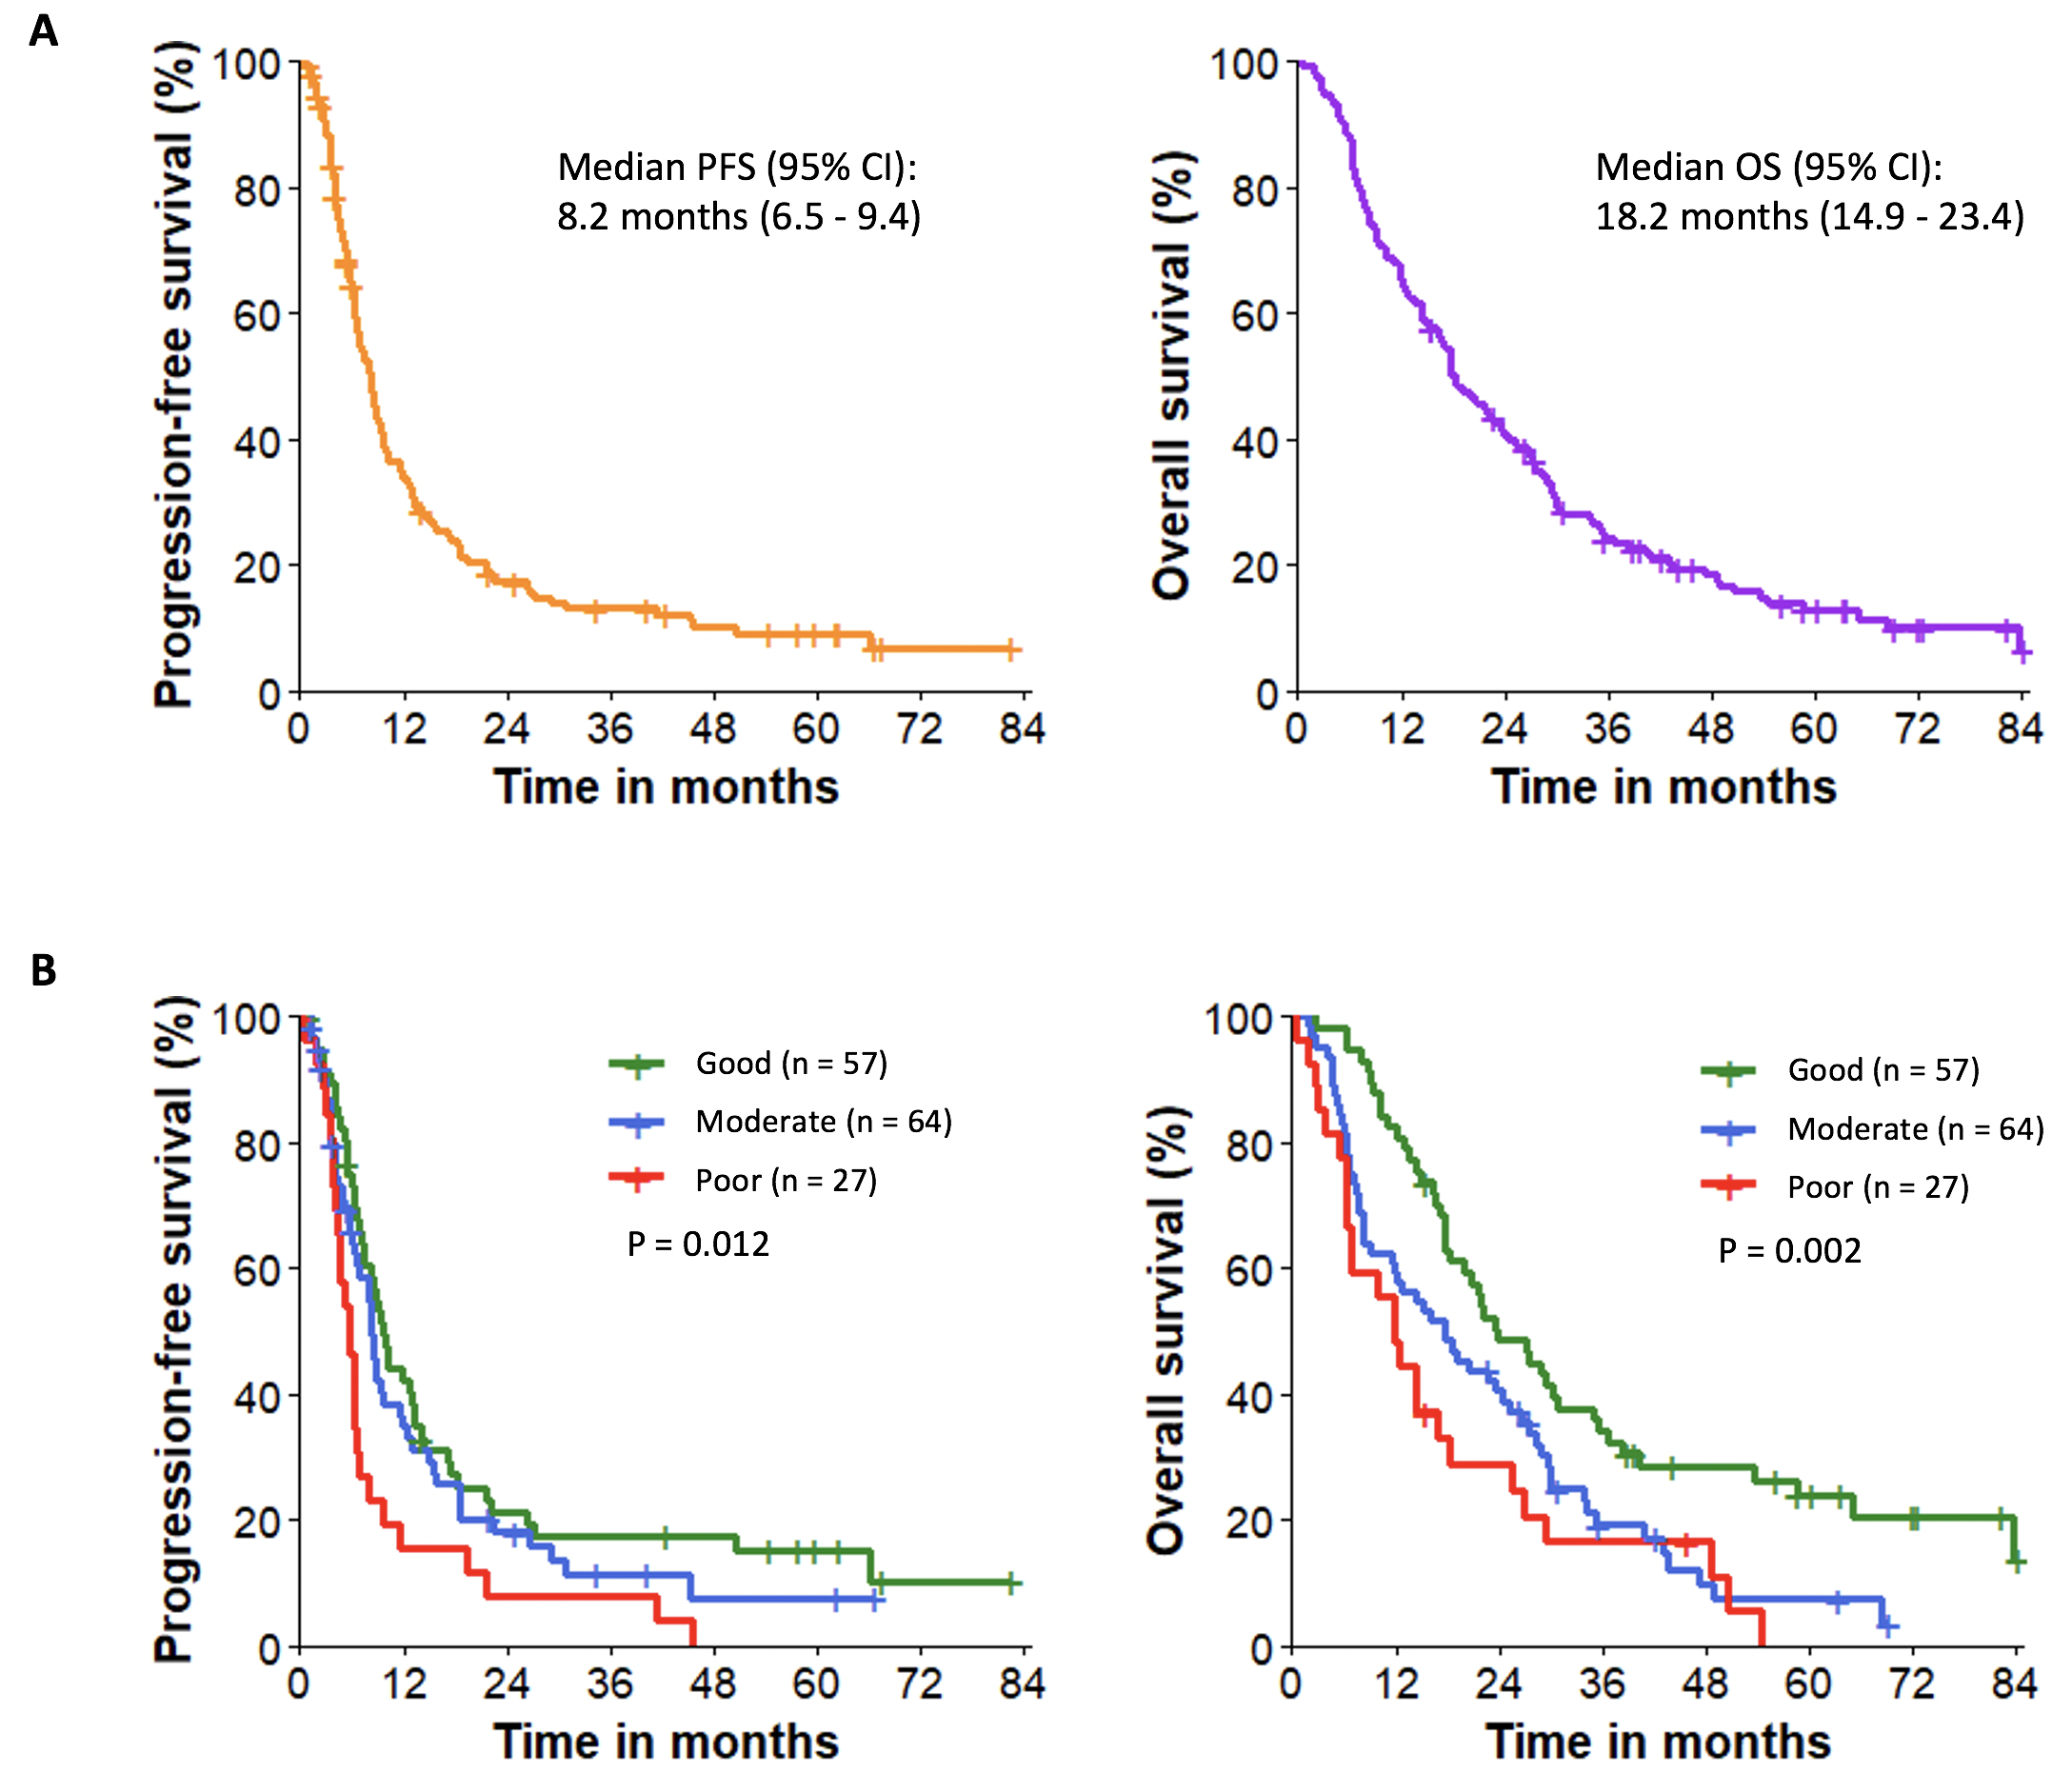


**Supplementary fig. 1.** Survival outcomes. **(A)** PFS and OS in the overall study population. **(B)** PFS and OS according to risk group.


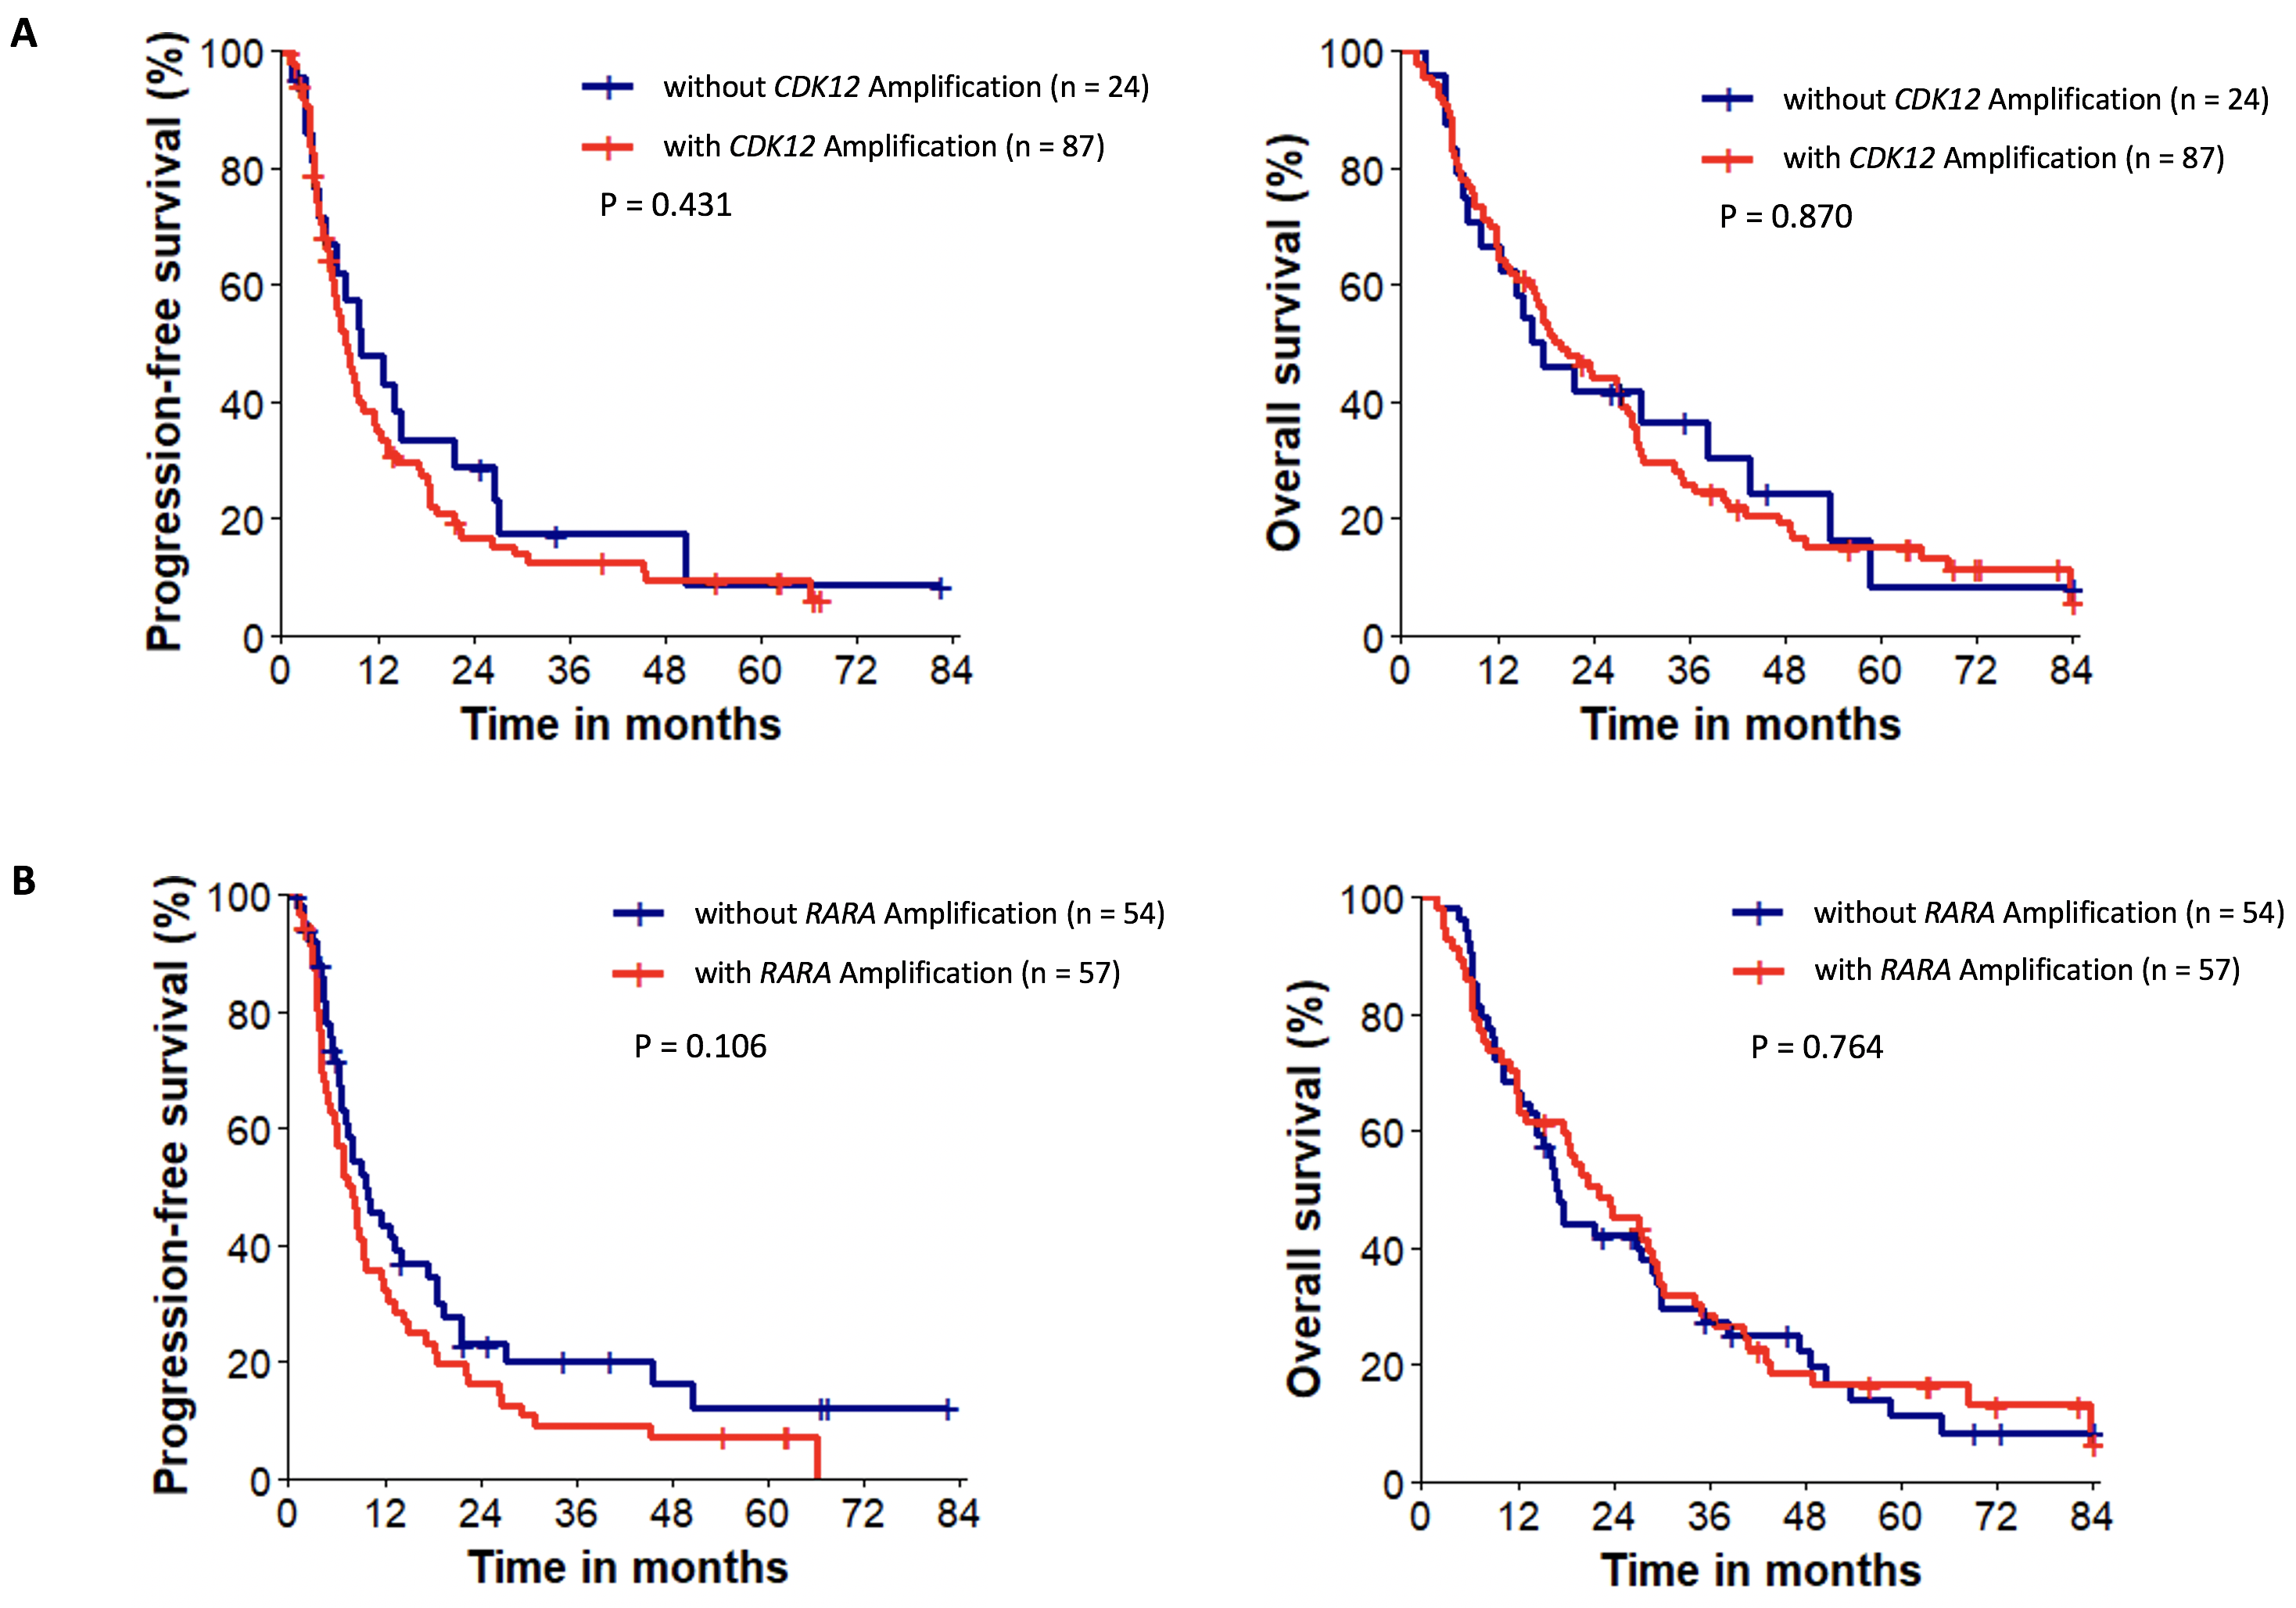


**Supplementary fig. 2.** Survival outcomes between 111 *ERBB2*-amplified patients with co-amplification versus without **(A)** *CDK12* gene and **(B)** *RARA* gene.


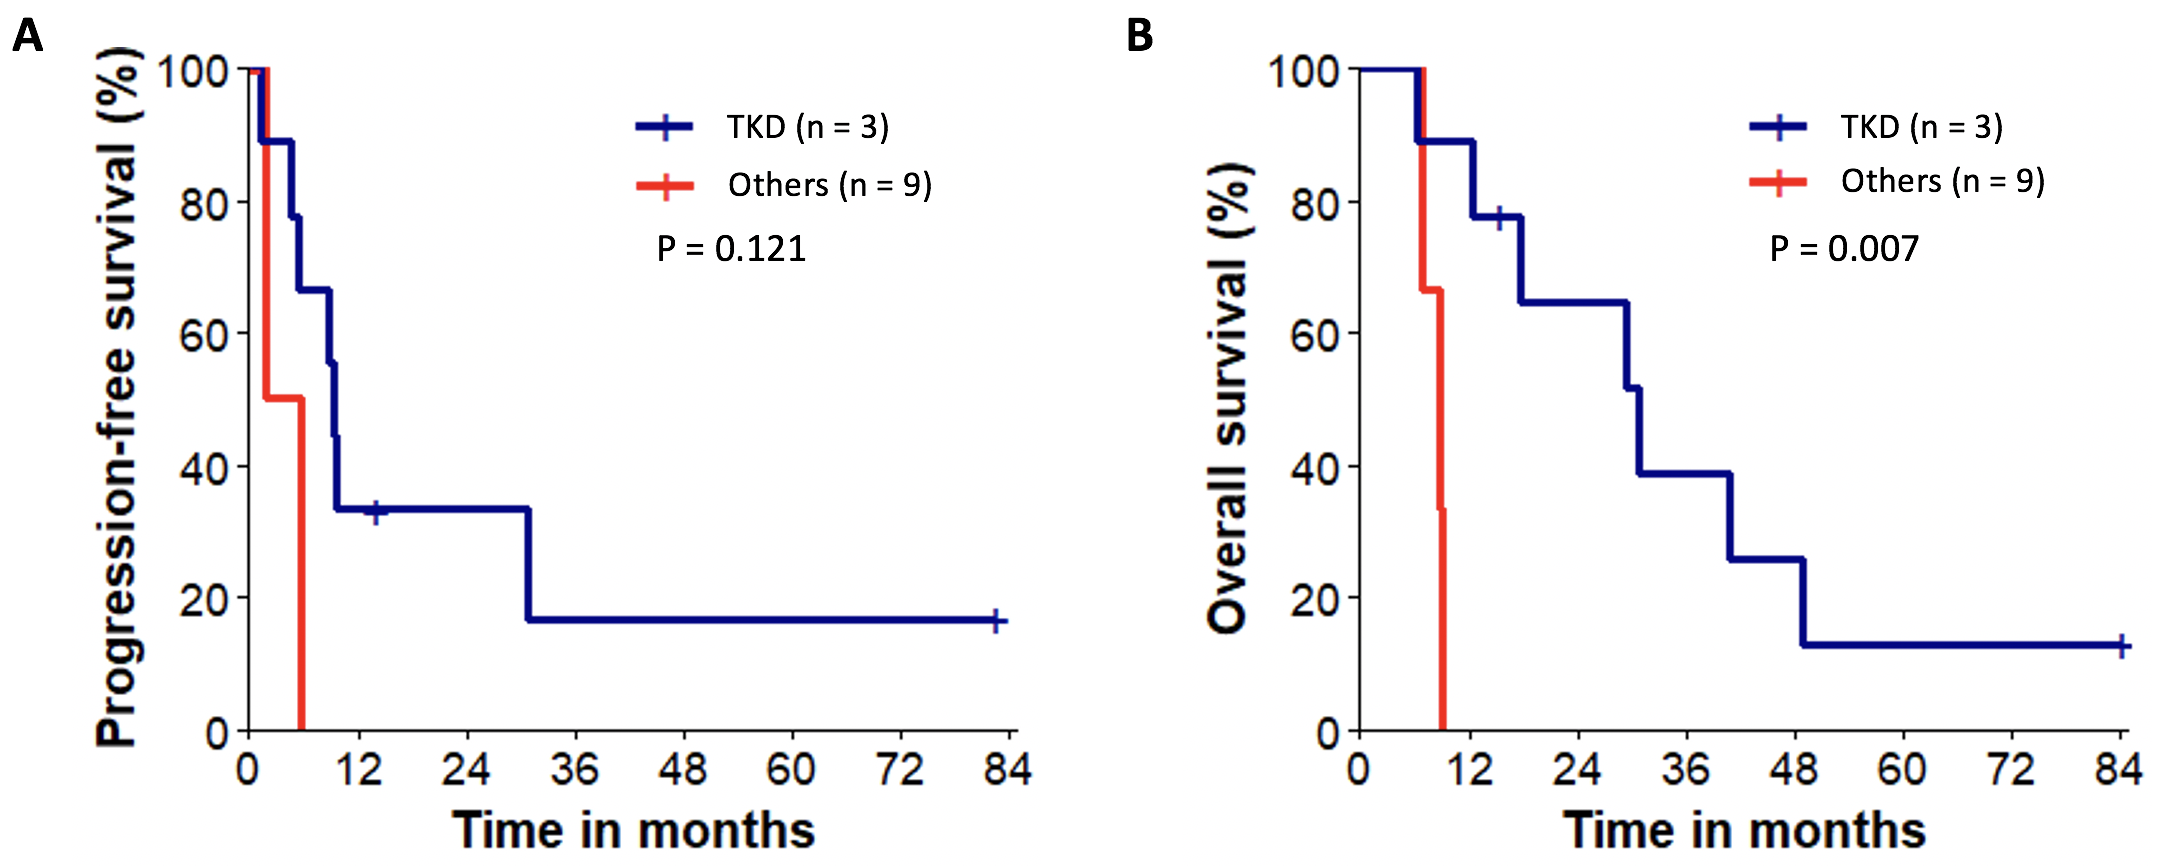


**Supplementary fig. 3.** Kaplan–Meier curves for survival based on *ERBB2* tyrosine kinase domain mutations. **(A)** PFS and **(B)** OS. TKD, tyrosine kinase domain; others, other structural domains of the HER2 protein, including extracellular, transmembrane, juxtamembrane, and intracellular domains.


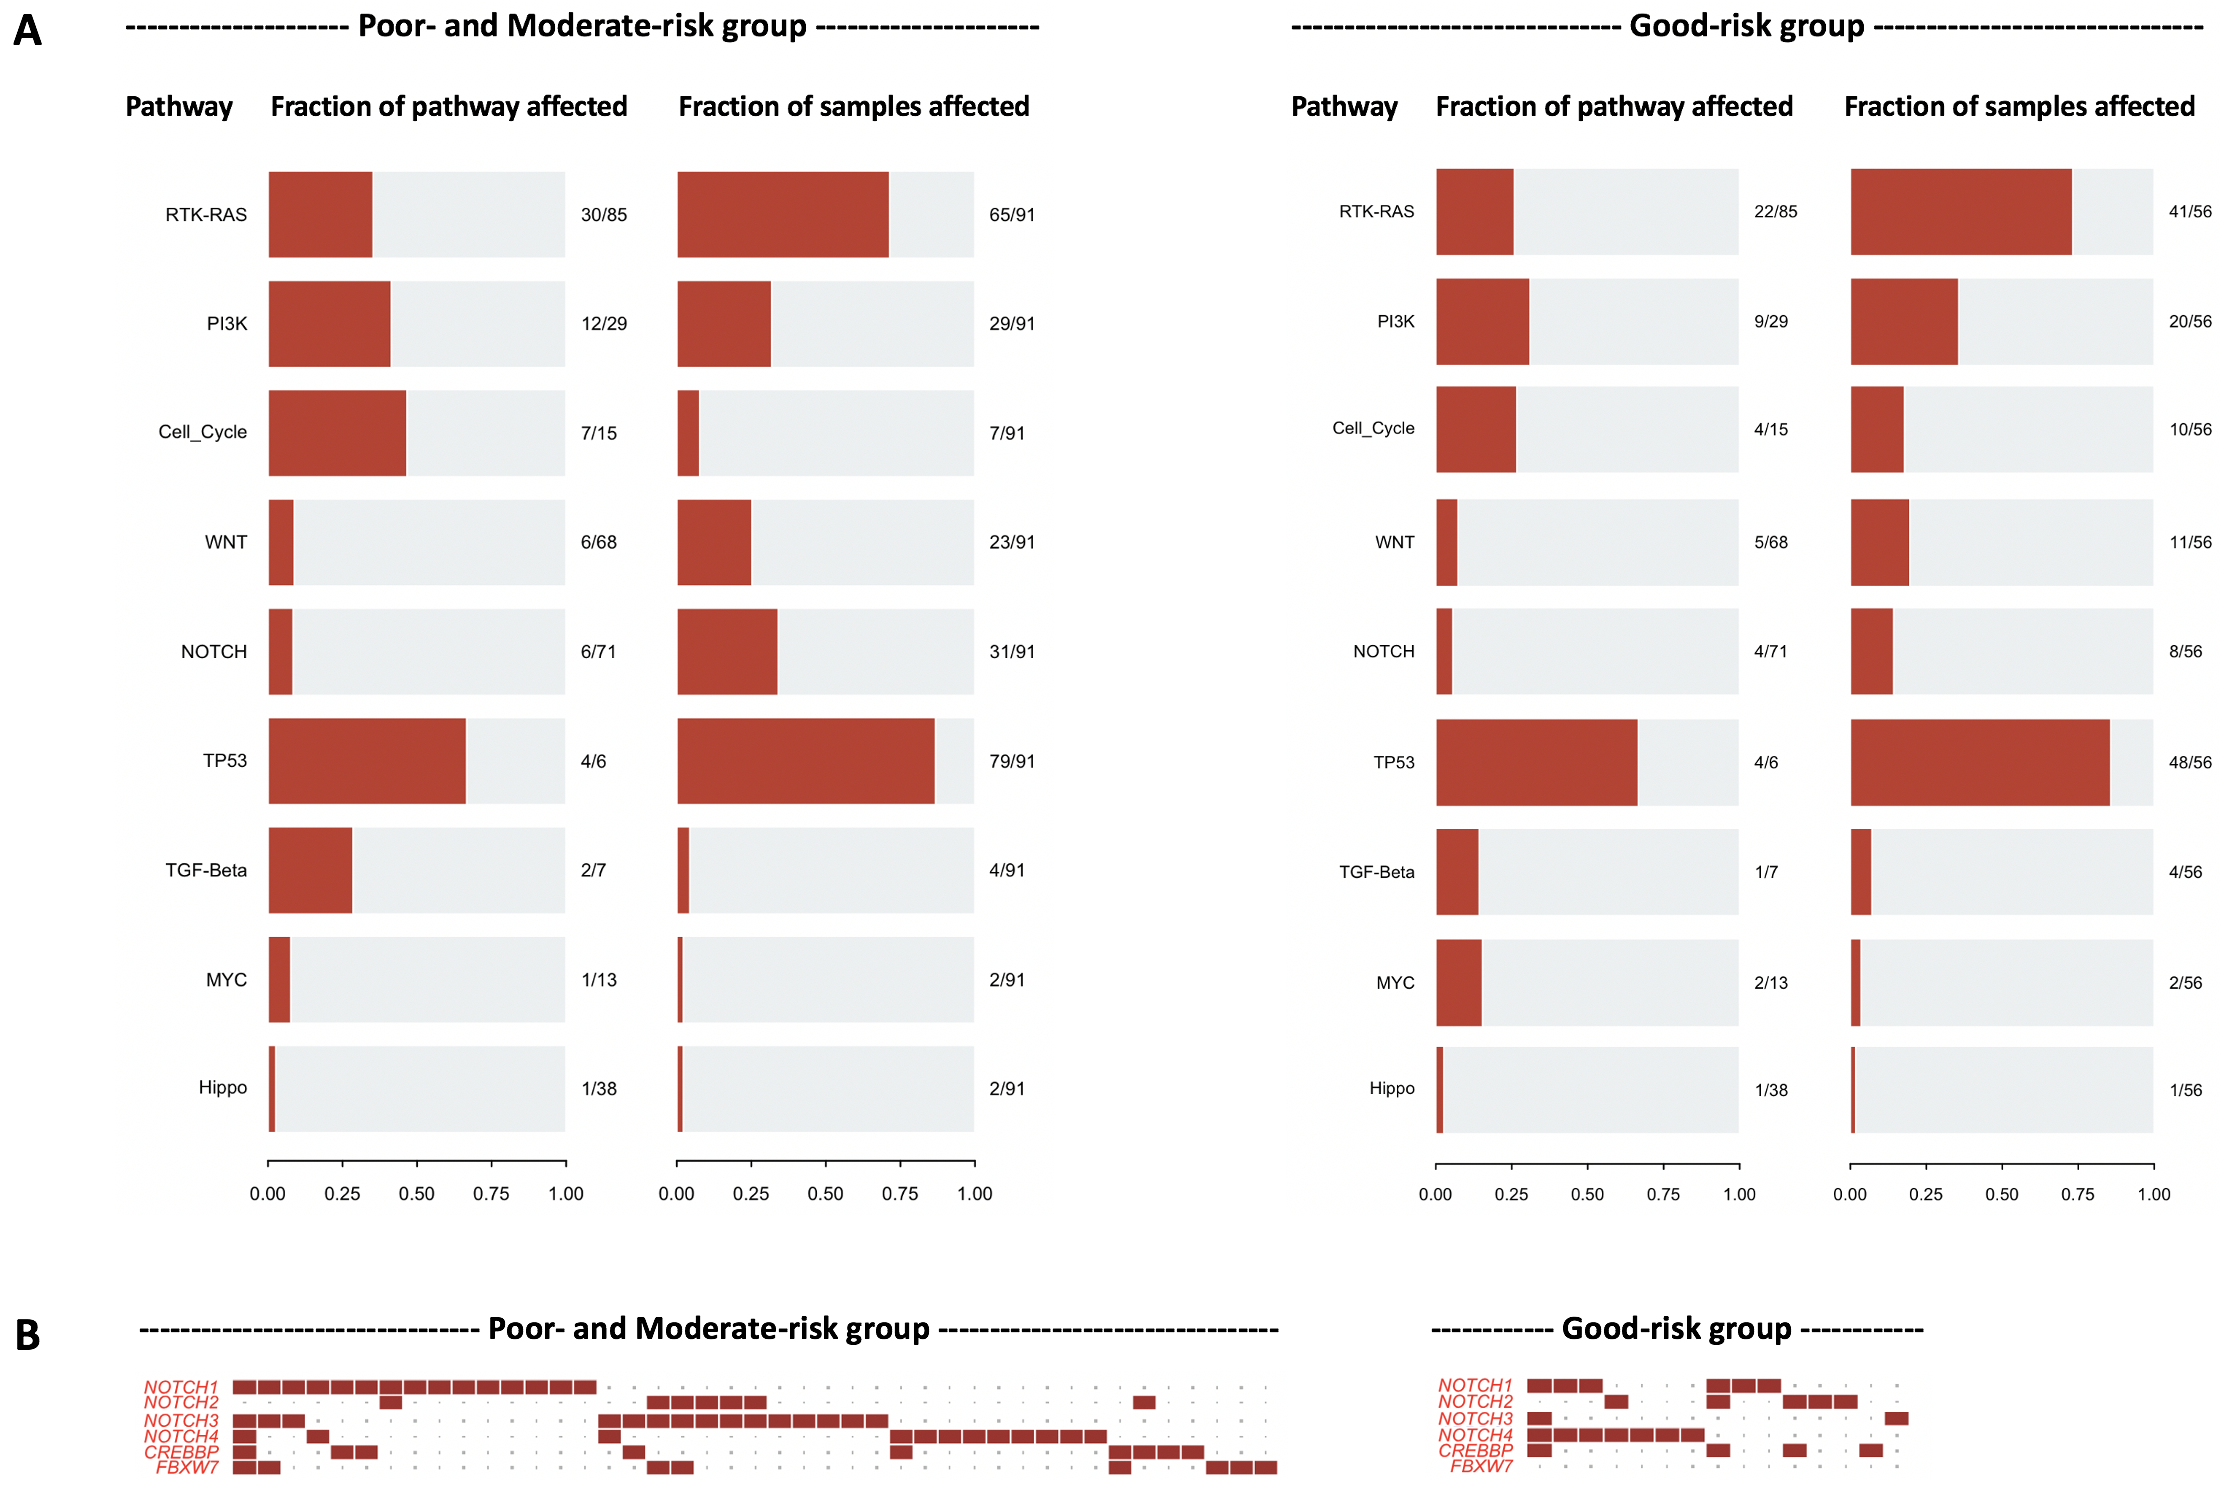


**Supplementary fig. 4.** Maftools analyses of genomic mutations in risk group. (A) Enrichment analysis of known oncogenic pathway among the risk group. (B) Alterations in *NOTCH* pathway. Only altered genes are presented, excluding non-altered genes in the pathway

**Supplementary table 1.** *ERBB2* mutations detected by targeted cancer panel sequencing.

| **Patient with *ERBB2* mutations** | ***ERBB2* alteration variant (VAF), amplification (CN)** | ***ERBB2* domain** | **OncoKB annotation** |
| --- | --- | --- | --- |
| 1 | R157Q (0.03), amplification (5) | ECD | Unknown |
| 2 | C227G (0.06), S656C (0.38), amplification (65) | ECD, TMD | Unknown, likely_GOF |
| 3 | E265V (0.11), amplification (35) | ECD | Likely_GOF |
| 4 | A270S (0.58), amplification (6) | ECD | Unknown |
| 5 | D277Y (0.74), amplification (33) | ECD | GOF |
| 6 | R678Q (0.12), amplification (6) | JMD | GOF |
| 7 | V697L (0.27) | JMD | Inconclusive |
| 8 | N708S (0.12), amplification (16) | JMD | Unknown |
| 9 | D769H (0.92), amplification (38) | TKD | GOF |
| 10 | V777L (0.35), amplification (6) | TKD | GOF |
| 11 | L841V (0.92), amplification (37) | TKD | Likely_GOF |
| 12 | S1050L (0.38), amplification (6) | ICD | Unknown |

Abbreviations: VAF, variant allele frequency; CN, copy number; ECD, extracellular domain; TMD, transmembrane domain; JMD, juxtamembrane domain; TKD, tyrosine kinase domain; ICD, intracellular domain; GOF, gain of function.
